# Supplementary material for: Enlightening Gliotoxin Biological System in Agriculturally Relevant Trichoderma spp
Source: Front Microbiol. 2020 Mar 12;11:200. doi: 10.3389/fmicb.2020.00200 (PMC7080844; doi:10.3389/fmicb.2020.00200)
Supplement: Supplementary file 2 [file Table_1.xlsx]

## Sheet: Foglio1
Table S1. Genomic information for A. fumigatus gli genes and proteins and for putative orthologs and deduced proteins in various Trichoderma spp. strains. Accession numbers (Acc. n.) for each gene and protein are reported where available, otherwise position in the scaffold is indicated
		A.fumigatus Af293		T.virens Gv 29-8		T.virens FT-333		T.afroharzianum T6776		T. reseei RUT-C30		T. reseei QM6a		T. longibrachiatum SMF2	T.harzianum TR274		T.harzianum CBS 226.95		T.harzianum B97		T.gamsii T6085
Gene function	Gene	Gene Acc. n. AFUA_	Protein Acc. n.	Gene Acc. n. TRIVIDRAFT_	Protein Acc. n.	Gene position	FT-333 SCAFFOLD_	Gene Acc. n. THAR02_	Protein Acc. n.	Gene Acc. n. M419DRAFT_	Protein Acc. n.	Gene Acc. n. TRIREDRAFT_	Protein Acc. n.	Gene position in KB290581.1	Gene Acc. n. Triharl_	Protein Acc. n.	Gene Acc. n. M431DRAFT_	Protein Acc. n.	Gene position in scaffold 234		Gene Acc. n. TGAM01_	Protein Acc. n.
Zn(II)2-Cys(6) binuclear cluster domain transcription factor	gliZ	6G09630	EAL88814.1	191964	EHK21730.1	--		--		--		--		--	--	--	--	--	--	--	--	--
1-aminocyclopropane-1-carboxylate synthase	gliI	6G09640	EAL88815.1	53497	EHK22001.1	582-2090	0432	07222	KKP00668.1	133449	ETR98471.1	54160	EGR52473.1	1990061-1991514	821296	PKK53438	555938	PTB52990.1	47748-49216		--	--
Membrane dipeptidase (M19)	gliJ	6G09650	EAL88816.2	216163*	EHK21959.1	456-2300	0450	07224 (27202-28742')	KKP00670.1	133453	ETR98475.1	103119	EGR53015.1	2001934-2003256	861371	PKK53444.1	555948	PTB52994.1	36670-37287		--	--
bimodular nonribosomal peptide synthetase (NRPS)	gliP	6G09660	EAL88817.1	78708	EHK22005.1	3938-10589	0433	07223 (18881-25715')	KKP00669.1	133451	ETR98473.1	24586	EGR52474.1	1993775-2001823	861365	PKK53446.1	496332	PTB52992.1	38308-45516		--	--
cytochrome P450 oxidoreductase	gliC	6G09670	EAL88818.2	216161	EHK22004.1	1413-3568	0433	07221 (16788-18346')		133450	ETR98472.1	53168	EGR53014.1	1991690-1993048	800887	PKK53445.1	521249	PTB52991.1	45867-46864		--	--
O-methyltransferase (OMT)	gliM	6G09680	EAL88819.2	216154	EHK21998.1	1494-1700/3-1602	0430/0431	07227	KKP00673.1	38490	ETR98480.1	53025	EGR53018.1	2017442-2018767	384240	PKK53418.1	145749	PTB52999.1	20817-22135		--	--
glutathione S-transferase	gliG	6G09690	EAL88820.2	216157	EHK22000.1	5223-6181/1-216	0431/0432	07224 (28853-29674')	KKP00670.1	64348	ETR98476.1	32402	EGR53016.1	2003697-2004408	861377	PKK53449.1	496335	PTB52995.1	34811-37287		--	--
Gamma-glutamyl cyclotransferase (GGCT)	gliK	6G09700	EAL88821.2	151379	EHK22002.1	2723-3527	0432	07223 (26088-26962')	KKP00669.1	88682	ETR98474.1	54784	EGR52475.1	1993775-2001823	692986	PKK53443.1	88512	PTB52993.1	37433-38307		--	--
MFS gliotoxin efflux transporter	gliA	6G09710	EAL88822.1	31219**	EHK24366.1	17197-19089	0040	07226	KKP00672.1	11801	ETR98479.1	53503	EGR52888.1	2012621-2016986	861393	PKK53442.1	521250	PTB52998.1	22578-26998°		--	--
Methyltransferase (NMT)	gliN	6G09720	EAL88823.1	91355	EHK22003.1	5909-7342	0432	13718-14747'		11794	ETR98470.1	103114	EGR53013.1	1988438-1989415	831721	PKK53439.1	118424	PTB52989.1	51208-51733		--	--
cytochrome P450 oxidoreductase	gliF	6G09730	EAL88824.1	91346	EHK21999.1	1892- 3929	0431	07225	KKP00671.1	38488	ETR98478.1	56687	EGR51468.1	2010691-2011070	692955	PKK53447.1	145743°	PTB52997.1	28200-30145'		--	--
	gliF°	--		--		--		07228	KKP00674.1	133459	ETR98481.1	27722	EGR53019
Thioredoxin reductase	gliT	6G09740	EAL88825.1	138628***	EHK22124.1	2367-3435	0548	07229	KKP00675.1	103366	ETR98482.1	74278	EGR52478.1	2021898-2023076	861403	PKK53428.1	88869	PTB53001.1	16638-17871		--	--
				31354**	EHK24545.1
hypothetical protein	gliH	6G09745	EAL88826.2	216138***	EHK22125.1	--		--		--		--		--	--		--		--		--
C2H2 Zn finger	gipA	6G01910A	EAL85848.1	89428	EHK23946.1	102733-103980	0242	09175°	KKO98715.1	100508	ETS00940.1	122541	EGR47513.1	24744-25220'	783345*	PKK47073.1	82921*	XP_024775855.1	57369 -57728*		v202426'	PON28579.1
gliotoxin thiomethyltransferase	gtmA	2G11120	EAL93407.1	59236	EHK20891.1	172425-173436	0332	10028^	KKO97872.1	75073	ETS03596	111082	EGR45400.1	17853-18844''	830344^	PKK41428.1	497612^	XP_024771984.1	121456-121860^		v208885''	PON22204.1
		-- = not present		* scaffold ABDF02000051.1				° scaffold JOKZ01000392.1				'gene position in GL985056.1		'gene position in ANBJ01000042.1	* TR274 scaffold 365		*M431scaffold_5_Cont68		° B97 scaffold_131		'scaffold 6.2
				** scaffold ABDF02000004.1				^ scaffold JOKZ01000493.1							^ TR274 scaffold_1255		^M431scaffold_10_Cont110		*B97 scaffold_39		''scaffold 40.2
				***scaffold ABDF02000010.1				'gene position in scaffold JOKZ01000238.1						''gene position in ANBJ01000075.1					^B97 scaffold_88
																	°using TAT6776 gliF		'using TaT6776gliF
