# Supplementary material for: Enlightening Gliotoxin Biological System in Agriculturally Relevant Trichoderma spp
Source: Front Microbiol. 2020 Mar 12;11:200. doi: 10.3389/fmicb.2020.00200 (PMC7080844; doi:10.3389/fmicb.2020.00200)
Supplement: Supplementary file 6 [file Table_5.xlsx]

## Sheet: Foglio1
Table S5. Main features of the gli cluster and organization of the gliotoxin biosynthesis genes (GT- BG) in the Trichoderma strains studied in this work. For the gli cluster, its length, the scaffold where it is located in the genome and the number of gli genes situated within it are presented. For the GT-BG, the total number of gli genes, those located outside of the gli cluster and the gli gene…
Strain	Cluster			GT-BG
	lenght (bp)	scaffold	n°genes	n°genes	outside		absent
TvGV29-8	27258	TRIVIscaffold_47	8	12	4	A,T,H,J	Z
TvFT333	26736	Scaffolds_0430-433	8	11	3	A,T,H,J	H; Z
TrRUTC30	34689	TRIREscaffold_24	11	11	0		H; Z
TrQM6A	34694	TRIREscaffold_1	11	11	0		H; Z
TaT6776	35284	JOKZ01000238.1	11	11	0		H; Z
ThB97	35095	MRYK01000234.1	11	11	0		H; Z
Th226.95	34243	M431scaffold_8	11	11	0		H; Z
ThTR274	34274	Scaffold_42	11	11	0		H; Z
TlSMF2	33140	KB290581.1	11	11	0		H; Z
TgT6085	--	--	--	--	--		all
